# Supplementary material for: Precise Design of Alginate Hydrogels Crosslinked with Microgels for Diabetic Wound Healing
Source: MDPI journal article supplement (doi:10.3390/biom12111582), 2022-10-28
Supplement: s1 [file s1]

**Electronic Supporting Information for**

**Precisely design of alginate hydrogels crosslinked with microgels for  
diabetic wound healing**

Yishu Yan <sup>1,†,\*</sup>, Panpan Ren <sup>1,†</sup>, Qingqing Wu <sup>1</sup>, Tianmeng Zhang <sup>2</sup>

1. School of Life Science And Health Engineering, Jiangnan University, Wuxi 214122, China
2. Bloomage Biotechnology Corporation Limited, Jinan 250101, China

\* Correspondence to Yishu Yan (E-mail: [yanyishu@sina.com](mailto:yanyishu@sina.com)). The addresses:  
No. 1800, Lihu Avenue, Wuxi 214122, China

† The authors contributed equally to this paper.

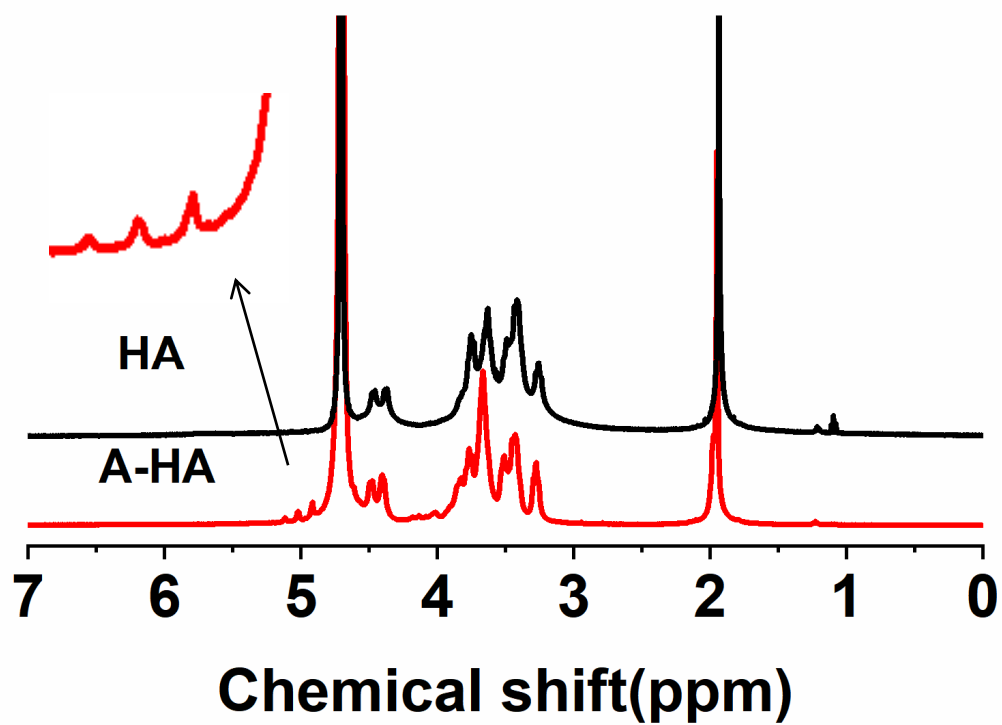

**Figure S1** <sup>1</sup>H-NMR spectra of HA and A-HA. Compared with HA, two new peaks at 4.9 ppm and 5.0 ppm were observed on the <sup>1</sup>H-NMR spectrum of A-HA, corresponding to hemiacetalic protons formed from the aldehyde groups and neighboring hydroxyl groups (Li et al., 2014).

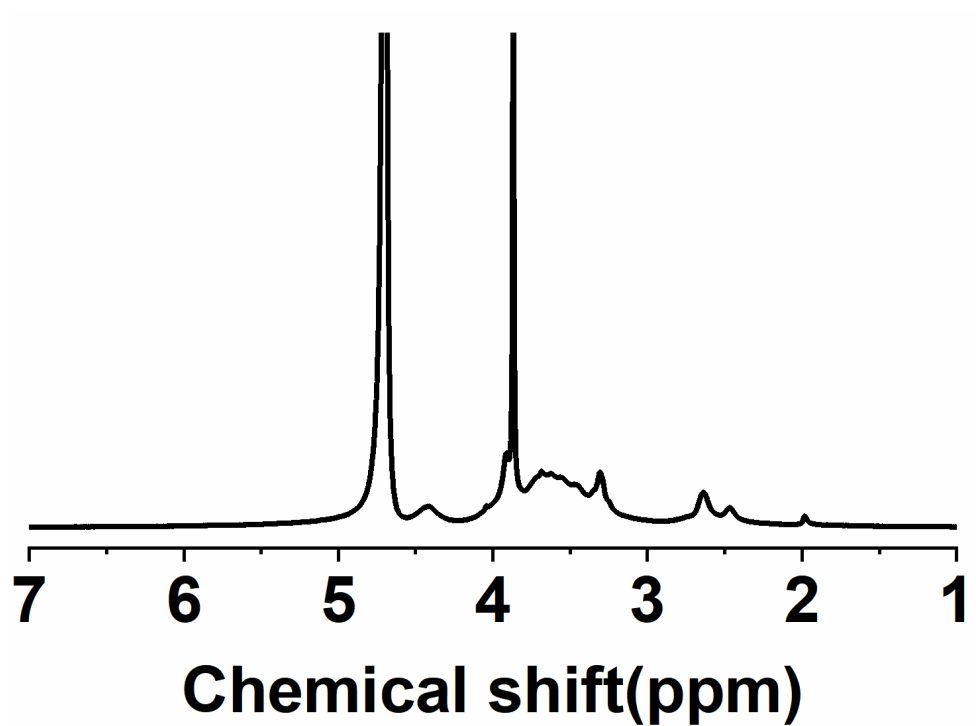

**Figure S2** The  $^1\text{H}$ -NMR spectrum of CMCS. The signals at 2.7 ppm was corresponded to the carboxymethyl group grafted onto the amino groups (C-2) and hydroxyl groups (C-6).

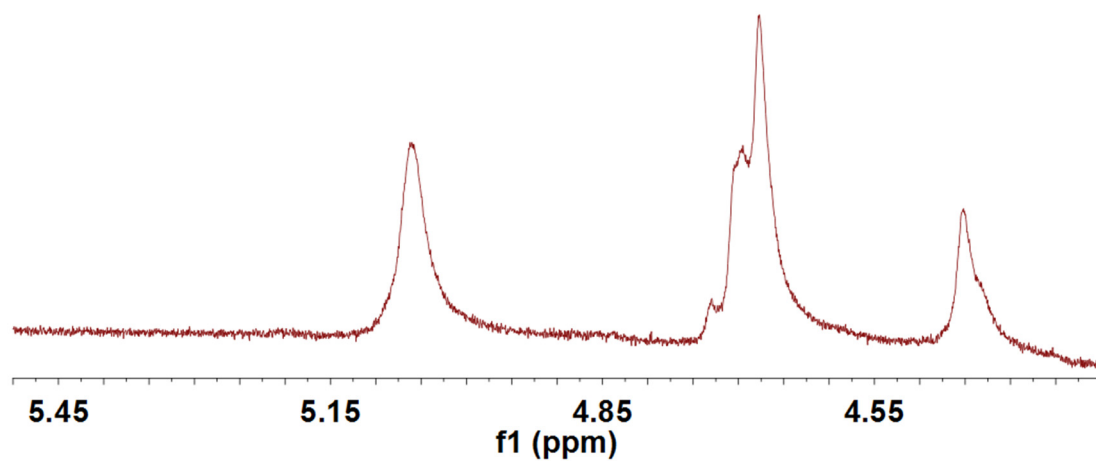

**Figure S3** The  $^1\text{H}$ -NMR spectrum of alginate. The chemical shifts of the anomeric proton signals were A (G) at around 5.2 ppm; B1 (MGM) at 4.75 ppm; B2 (MG) at 4.71 ppm; B3 (MM) at 4.68 ppm and C (GG) at 4.48 ppm. The ratio of G/M is around 1:2 according to the spectrum.

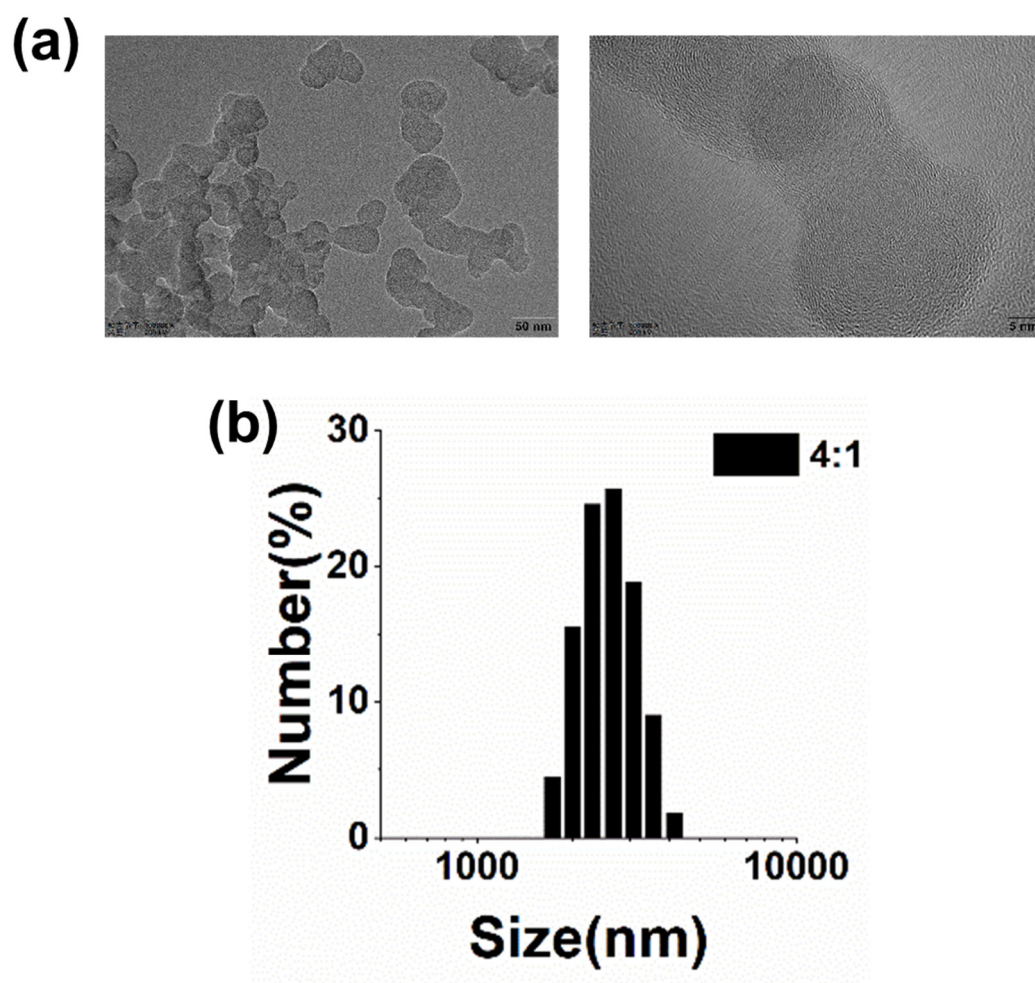

**Figure S4** Characterization of the microgels. (a) TEM observations of the microgel morphology. (b) The dynamic diameter of the microgels.

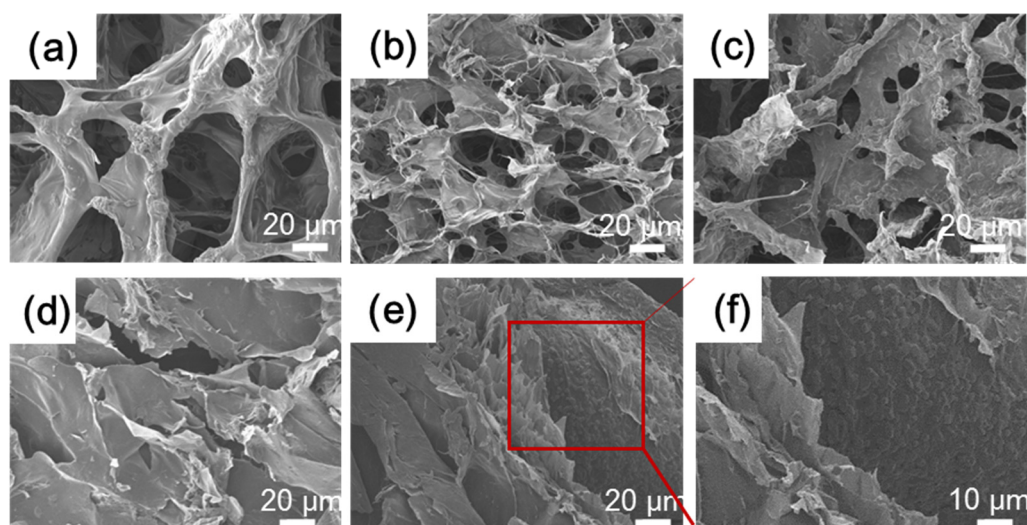

**Figure S5 (a–f)** Enlarged SEM images of the hydrogels of A (a), B (b), C (c), and D (d). The images of (e) is a side cut of D, local enlarged in (f).

**Table S1** The relative molecular weight & distribution of the polysaccharides

|      | <b>Retention time</b><br><b>(Min)</b> | <b>Mn</b><br><b>(kDa)</b> | <b>Mw</b><br><b>(kDa)</b> | <b>MP</b><br><b>(kDa)</b> |
|------|---------------------------------------|---------------------------|---------------------------|---------------------------|
| HA   | 13.33                                 | 478500                    | 2873700                   | 1511700                   |
| A-HA | 14.85                                 | 105100                    | 287400                    | 225600                    |
| CMCS | 16.28                                 | 23200                     | 41300                     | 37100                     |

## Reference

Li, L., Wang, N., Jin, X., Deng, R., Nie, S., Sun, L., . . . Gong, C. (2014). Biodegradable and injectable in situ cross-linking chitosan-hyaluronic acid based hydrogels for postoperative adhesion prevention. *Biomaterials*, 35(12), 3903-3917.
